# Supplementary material for: Novel molecularly imprinted malachite green bifunctional imprinted microspheres through Pickering emulsion polymerization
Source: Royal Society of Chemistry journal article supplement (doi:10.1039/d1nj02688g), 2021-01-01
Supplement: d1nj02688g1.pdf [file d1nj02688g1.pdf]

## Supplementary Information

Novel molecularly imprinted malachite green  
bifunctional imprinted microspheres through pickering  
emulsion polymerization

Shi Wang<sup>a</sup>, Chunsheng Lei<sup>a,\*</sup>, Shihao Liu<sup>a</sup>, Zhewei Zhang<sup>a</sup>, Ruyi Li<sup>a</sup>, Siyang Feng<sup>b</sup>  
*School of Environmental and Safety Engineering, Changzhou University, Changzhou,  
213164, P.R. China. E-mail: [qiuyu\\_lei@126.com](mailto:qiuyu_lei@126.com)*

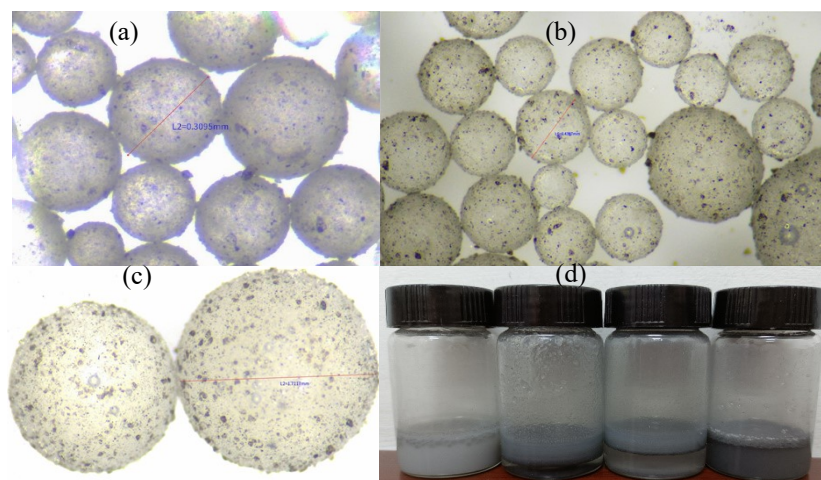

**Fig. S1** Optical picture of a series of Pickering emulsions prepared with various oil/water ratios (1/6 (a), 2/6 (b), and 3/6 (C), v/v, the volume of deionized water was 6 mL) at KABT concentration of 5 mg mL<sup>-1</sup> (6 mL deionized water); Picture(d) of MG Pickering emulsion stabilized byKABT at different concentration(30,50, 60, 80 mg, from left to right).

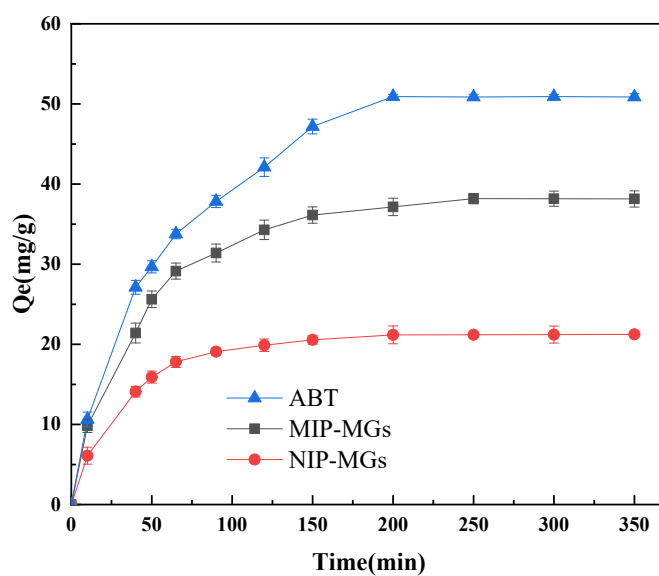

**Fig. S2** Adsorption properties of MIP-MGs/NIP-MGs

**Table S1** Optimization of the ratio of functional monomers to crosslinker

| MIP-MGs         | MG<br>(mg) | MAA<br>(mmol) | EDGMA<br>(mmol) | AIBN<br>(mg) | Adsorption capacity<br>(mg g <sup>-1</sup> ) |
|-----------------|------------|---------------|-----------------|--------------|----------------------------------------------|
| MIP-MG 1        | 10         | 0.06          | 0.20            | 20           | 18.33                                        |
| MIP-MG 2        | 10         | 0.10          | 0.20            | 20           | 22.86                                        |
| <b>MIP-MG 3</b> | <b>10</b>  | <b>0.08</b>   | <b>0.20</b>     | <b>20</b>    | <b>38.12</b>                                 |
| MIP-MG 4        | 10         | 0.08          | 0.16            | 20           | 23.12                                        |
| MIP-MG 5        | 10         | 0.08          | 0.24            | 20           | 17.29                                        |

**Table S2** Pore structural parameters of the prepared catalysts

| Sample | Surface area<br>(m <sup>2</sup> /g) | Pore<br>volume (cm <sup>3</sup> /g) | Average<br>aperture (nm) |
|--------|-------------------------------------|-------------------------------------|--------------------------|
| Bi-Ti  | 137.2223                            | 0.001026                            | 10.64444                 |
| KABT   | 165.6655                            | 0.018812                            | 9.25256                  |

**Table S3** Fitting parameters of adsorption kinetics for MG

|         | Q <sub>m</sub> (mg·g <sup>-1</sup> )<br>1) | Pseudo-first-order                         |                                     |                | Pseudo-second-order                        |                                                               |                |
|---------|--------------------------------------------|--------------------------------------------|-------------------------------------|----------------|--------------------------------------------|---------------------------------------------------------------|----------------|
|         |                                            | Q <sub>e</sub> (mg·g <sup>-1</sup> )<br>1) | k <sub>1</sub> (min <sup>-1</sup> ) | R <sup>2</sup> | Q <sub>e</sub> (mg·g <sup>-1</sup> )<br>1) | k <sub>2</sub> (g·mg <sup>-1</sup> ·min <sup>-1</sup> )<br>1) | R <sup>2</sup> |
| MIP-MGs | 38.1995                                    | 37.4529                                    | 0.02267                             | 0.9614         | 43.8167                                    | 0.04054                                                       | 0.9863         |
| NIP-MGs | 21.2813                                    | 21.06651                                   | 0.03058                             | 0.9647         | 22.9848                                    | 0.04359                                                       | 0.9751         |

**Table S4** Fitting parameters of isothermal adsorption for MG

|         | Langmuir model                       |                                      |                | Freundlich model                     |        |                |
|---------|--------------------------------------|--------------------------------------|----------------|--------------------------------------|--------|----------------|
|         | Q <sub>m</sub> (mg·g <sup>-1</sup> ) | K <sub>L</sub> (L·mg <sup>-1</sup> ) | R <sup>2</sup> | K <sub>F</sub> (mg·g <sup>-1</sup> ) | 1/n    | R <sup>2</sup> |
| MIP-MGs | 36.5813                              | 0.0225                               | 0.9804         | 18.2823                              | 0.2336 | 0.9574         |
| NIP-MGs | 27.5027                              | 0.0252                               | 0.9097         | 9.7031                               | 0.2766 | 0.7780         |

**Table S4** Selectivity of MIPM and NIPM for MG

| Comparison<br>of<br>components | MIP-MGs      |                          |                         |                | NIP-MGs      |                          |                         |                | K <sub>0</sub> |
|--------------------------------|--------------|--------------------------|-------------------------|----------------|--------------|--------------------------|-------------------------|----------------|----------------|
|                                | Ce<br>(mg/L) | q <sub>e</sub><br>(mg/L) | K <sub>d</sub><br>(L/g) | K <sub>s</sub> | Ce<br>(mg/L) | q <sub>e</sub><br>(mg/L) | K <sub>d</sub><br>(L/g) | K <sub>s</sub> |                |
| MG                             | 4.82         | 21.18                    | 4.39                    |                | 10.28        | 14.78                    | 1.44                    |                |                |
| RB                             | 12.24        | 12.76                    | 1.04                    | 4.26           | 11.83        | 13.17                    | 1.11                    | 1.30           | 3.28           |
| CV                             | 11.18        | 13.82                    | 1.17                    | 3.75           | 11.21        | 13.79                    | 1.23                    | 1.17           | 3.21           |

**Table S5** The degradation kinetic constants and regression coefficients of MG and CV degradation under different experimental conditions

|                         | Parameters                  | MIP-MGs         | NIP-MGs                       | ABT       |
|-------------------------|-----------------------------|-----------------|-------------------------------|-----------|
| <b>MG degradation</b>   | $k$<br>(min <sup>-1</sup> ) | 0.0225          | 0.0083                        | 0.01213   |
|                         | R <sup>2</sup>              | 0.9472          | 0.9923                        | 0.9097    |
| <b>CV degradation</b>   | Parameters                  | MIP-MGs         | NIP-MGs                       | BTC       |
|                         | $k$<br>(min <sup>-1</sup> ) | 0.00834         | 0.00775                       | 0.01277   |
|                         | R <sup>2</sup>              | 0.9159          | 0.9374                        | 0.8965    |
| <b>solution pH</b>      | Parameters                  | 6               | 7                             | 8         |
|                         | $k$<br>(min <sup>-1</sup> ) | 0.00724         | 0.01115                       | 0.01251   |
|                         | R <sup>2</sup>              | 0.91871         | 0.94254                       | 0.92544   |
| <b>MIP-MGs dosage</b>   | Parameters                  | 0.4g/L          | 0.8g/L                        | 1.2g/L    |
|                         | $k$<br>(min <sup>-1</sup> ) | 0.00423         | 0.01113                       | 0.01032   |
|                         | R <sup>2</sup>              | 0.93981         | 0.90675                       | 0.92032   |
| <b>inorganic anions</b> | Parameters                  | Cl <sup>-</sup> | SO <sub>4</sub> <sup>2-</sup> | Not added |
|                         | $k$<br>(min <sup>-1</sup> ) | 0.00744         | 0.00871                       | 0.01176   |
|                         | R <sup>2</sup>              | 0.97444         | 0.9237                        | 0.9373    |

### Eq (S1)

The adsorption capacity  $Q$  (mg g<sup>-1</sup>) was calculated using equation (1):

$$Q = \frac{(C_0 - C_t)V}{m} \quad (1)$$

where  $Q$  (mg g<sup>-1</sup>),  $C_0$  (mg L<sup>-1</sup>),  $C_t$  (mg L<sup>-1</sup>),  $m$  (g),  $V$  (mL) are the equilibrium adsorption amount, initial MG concentration (mg/L), the concentration of MG after the adsorption for time (t), the mass of the adsorbent (g), and the volume of the solution (L), respectively.

### Eq (S2)

To evaluate the mass transfer and the rate-controlling process, the pseudo-first-order (PFO) and pseudo-second-order (PSO) expressed by Equation (2) and Equation (3) respectively, were used to analyze the kinetics data of MIP-MGs:

$$q_t = q_e \times (1 - e^{-k_1 t}) \quad (2)$$

$$q_t = k_2 q_e^2 t / (1 + k_2 q_e t) \quad (3)$$

where  $q_e$  (mg g<sup>-1</sup>) is the equilibrium adsorption capacity,  $q_t$  (mg g<sup>-1</sup>) is the binding quantity at different time  $t$  (min), and  $k_1$  (min<sup>-1</sup>) and  $k_2$  (g mL<sup>-1</sup>min<sup>-1</sup>) are the rate constants of pseudo-first-order and pseudo-secondorder models, respectively.

### Eq (S3)

The Langmuir and Freundlich isotherm adsorption models are given by Equation (4) and Equation (5):

$$q_e = q_{mL} k_L C_e / (1 + k_L C_e) \quad (4)$$

$$q_e = k_F C_e^{1/nF} \quad (5)$$

where  $q_e$  (mgg<sup>-1</sup>) and  $C_e$  (mgL<sup>-1</sup>) are equilibrium adsorption amount and equilibrium mass concentration respectively;  $q_{mL}$  (mgg<sup>-1</sup>) is the saturated monolayer maximum adsorption amount of the Langmuir model;  $K_L$  (Lmg<sup>-1</sup>) is the adsorption constants of the Langmuir;  $K_F$  (Lmg<sup>-1</sup>) and  $nF$  are the constant of adsorption capacity and adsorption density of Freundlich respectively.

### Eq (S4)

Selectivity evaluation:

$$K_d = q_e / C_e \quad (6)$$

$$k' = K_{d(MG)} / K_{d(x)} \quad (7)$$

$$K_0 = k'_M / k'_N \quad (8)$$

where  $K_d$ ,  $q_e$ , and  $C_e$  represent distribution coefficient, equilibrium absorption capacity, and equilibrium mass concentration, respectively;  $K'$  and  $K_{d(MG)}$  are selectivity and distribution coefficients for MG respectively;  $K_0$ ,  $k'_M$ , and  $k'_N$  represent relative selectivity coefficient, selectivity coefficient for MIP-MGs, and selectivity coefficient for NIP-MGs, respectively.

### Eq (S5)

The kinetics of the photocatalytic degradation of MG were fitted based on a pseudo-first-order kinetic model:

$$\ln C_0 / C_t = kt \quad (9)$$

where  $C_0$  (mg/L) is the initial concentration of MG (mg/L),  $C_t$  is the concentration at time  $t$  (min), and  $K$  ( $\text{min}^{-1}$ ) is the pseudo-first-order rate constant
